# Supplementary material
Source: MDPI journal article supplement (https://www.mdpi.com/2071-1050/10/11/4241)
Supplement: s1 [file s1]

Archive with 3 entries (3 files):
- S1 - Condition and Outcome Calibration Descriptions.pdf
- S2 - Data Collection Instruments.pdf
- S3 - Qualtiative Comparative Analysis Procedures.pdf
