# Supplementary material
Source: MDPI journal article supplement (https://www.mdpi.com/2071-1050/10/11/4241)
Supplement: s1 [file s1 › S2 - Data Collection Instruments.pdf]

## HOUSEHOLD QUESTIONS

### Introduction

- What is your current occupation? Your spouse (if applicable)? Is this the same as prior to Yolanda?
- Did you relocate after Yolanda? Can you describe this process? Did the government require relocation?

### Coordination

- What are your current priorities (income, shelter, etc.)?
  - What were your priorities after Yolanda? How have your priorities changed, if at all, since Ruby?
  - What were your rebuilding priorities (infrastructure) after Yolanda?
- How did you know what would happen with temporary, transitional, or permanent housing and infrastructure after Yolanda?
- How were you informed which organisations would be working in your barangay?
  - When did this occur?
- What organisations are currently working in your barangay?
  - How did you know that the organisation would be working in your barangay?
  - How do these organisations communicate with you?
    - What portion of these interactions are face-face meetings? Text? Social media? Other? What projects are these organisations currently working on?
  - What, if any, methods of communication do you use to connect and communicate with organisations working in your barangay?
- How does the government communicate to you?
- Are there any tensions with any of these relationships? What do they stem from?
- In recent months how has coordination changed? Can you describe how?
- Did you notice any changes in coordination, housing, or infrastructure after Ruby?
  - How did Ruby impact your house?
  - How did Ruby impact your barangay?
  - What did you do differently to prepare for Ruby as compared to Yolanda?
    - Where did you hear about Ruby?
    - Did you evacuate? Where?

## HOUSEHOLD QUESTIONS

### Stakeholder Participation

#### **Decision-Making**

- Who designed or make decisions regarding your house floorplan and features?
  - What features were important to you? Were these incorporated into the final plan?
  - What aspects about your house do you like? What do you not like or would you change if you could?
- How was the choice of building materials decided?
  - What materials do you believe are the best? Why?
  - What is the worst? Why?
- Who designed the current housing model?
  - Describe the process to reach a final design. Who was involved? How were designs presented to you?
  - What typhoon-resistant aspects were incorporated?
- How were you selected as a beneficiary?
  - What were the criteria? How was this communicated to you?

#### *If Relocation:*

- How was the relocation site selected?
- Were you given a choice of where to relocate?

#### **Implementation**

- What is the cost of your house?
  - How is the money for labour/materials distributed?
  - Do you provide cash for the house?
- Who purchases/provides the building materials?
  - Where are they purchased?
  - In what amounts/quantities?
- Who is providing labour for the project?
  - How long does it take to complete a house on average?

#### **Evaluation**

- Are you involved in helping with construction? Or overseeing/monitoring construction? After construction? How?
  - What aspects do you oversee?
  - What, if any, information was given to you to assist in this oversight?
- Is there a process for you to provide feedback/report complaints?
  - How you think these are handled?

## HOUSEHOLD QUESTIONS

### Training

- Have you recently attended a training session provided by an organisation?
- Can you walk me through how you were informed about this session, why you were invited to attend, and what was provided in the training?

#### ***Attended Training***

- How were you informed about the training?
- What organisation provided the training?
- Why were you interested in attending the training?
  - What did you hope to gain?
  - What skills or knowledge did you hope to gain?
  - What did you actually learn?
- Can you describe the training?
  - In what language was it?
  - Who led the session(s)?
  - Where was it held?
  - How long was the training?
- Were materials provided to you?
  - Were these helpful? In what ways?
  - Do you have these materials?
- What aspects of the training program was easy to understand?
  - Hard to understand?
- What, if any, incentives were used to gain interest/participation in the training?
  - Were you required to pay for the training? Were you paid?
  - How will the training benefit you?
- How did you hear about the training program?
- Why were you interested in attending the training?
- What suggestions do you have that might have made the training better?

#### ***Did Not Attend Training***

- Have you heard of any training programs being provided in the area/your barangay?
  - How did you hear about these?
- What types of training would be useful?
  - Would you pay for this training?
  - How far would you travel for a training?

Is there anything else you would like us to know?

## ORGANISATION QUESTIONS

### Introduction

- When did your organisation begin working in the Philippines?
  - How long does your organisation plan to stay?
- How many employees does your organisation employ (approximately) in the Philippines? Volunteers? Percent expat vs. local staff?
  - Has this changed since early recovery efforts? How and why?
  - How many are employed for this project?
- What is the current status of this project? Expected completion?

### Coordination

- What are the goals of this project? Are there any metrics for measuring success?
  - Has this changed as reconstruction efforts have progressed?
- Who are your donors of this project?
- What, if any, are your donor reporting requirements?
  - How frequently are these reports submitted?
- What, if any, performance requirements (e.g. building codes, people served, budget, etc.) are you trying to meet for this project?
- **How does your organisation coordinate across sectors? Within sectors?**
  - Do you coordinate with the organisations working in the same barangay that are working on WASH activities?
- Do you participate in ongoing government cluster meetings? Which ones? If not, why?
  - How often do you attend these meetings?
  - How has coordination under the new government clusters differed from past efforts under the UN system?
- Do you attend the *Humanitarian Shelter Working Group* meetings? If not, why?
  - How often do you attend these meetings?
  - Who is the lead organisation?
- Do you coordinate through any informal means (e.g. common social places, etc.)?
- Overall, what has worked well to coordinate? What has not?
- What coordination barriers have arisen?
- What, if any, project elements are not being coordinated? Why?
- In recent months how has coordination changed?
- Did you notice any changes in coordination efforts after Ruby?
  - How did Ruby impact your current project?

### Network Questions

Please list the organisations, communities, and/or government agencies you communicated with during the first six months after Yolanda. (Repeat for present)

- Were you coordinating with this entity before Yolanda?
  - Where? On what projects?
- At what level is this coordination (project, barangay, province, region, or national)?
- What type of information or resources are you sharing?
- How frequently are you communicating?
- Is it a formal relationship or informal?
- Are there any tensions? What do they stem from?

## ORGANISATION QUESTIONS

### Stakeholder Participation

#### *Decision-Making*

- Who decided the house floorplan and features?
  - How was this decided and communicated to the housing beneficiary? Other community members?
  - What features were important to the housing beneficiary? The municipality/barangay? Your organisation?
- How was the choice of building materials decided?
  - What factors were important in this decision?
- Who designed the current housing model?
  - Describe the process to reach a final design. Who was involved? How were designs presented to beneficiaries?
  - What hazard-resistant aspects were incorporated?
- What process was used to select housing beneficiaries?
  - When were they selected?
- How was the type of housing assistance (repair, temporary, permanent, etc.) decided?
  - Who provided the land for the project?

#### *If Relocation:*

- How was the relocation site selected?
- What factors were considered in selecting a site?

#### *Implementation*

- What is the cost of a single house?
  - How is the money for labour/materials distributed?
  - Is the beneficiary providing cash? The municipality? Other government agency?
- Who purchases/provides the building materials?
  - Where are they purchased?
  - In what amounts/quantities?
- Who is providing labour for the project?
  - Is there a requirement for a beneficiary to contribute labour or cash?
  - How long does it take to complete a house on average?

#### *Evaluation*

- Is your organisation involved in monitoring/oversight during construction? After construction?
  - What aspects do you oversee?
- What role did the beneficiaries have in monitoring/evaluation?
  - Were they provided any resources to assist with this (feedback boxes, hotline, etc.)?
  - What information is provided to the beneficiary about maintenance? When was this information provided?

## ORGANISATION QUESTIONS

### Training

#### **Goals and Objectives**

- What aspects of the current project require training individuals (carpenters, your own staff, government, etc.)?
  - What skills or knowledge do you aim to transfer to these individuals?
- How many individuals are you trying to train?
- Do you have written learning objectives or expected outcomes?

#### **Knowledge Transfer**

- How is training administered?
  - In what language?
  - Where are they held?
  - How long are these training sessions?
- When is on-site vs. off-site training used?
- What materials do you use to train individuals?
  - How were these materials developed?
- What aspects of training programs are easily understood by trainees?
  - Hard to understand?
- *How do you assess effectiveness of training?*
- *What are lessons learned—things not to do again as well as training methods that work well?*

#### **Motivations**

- What, if any, incentives are used to gain interest/participation in training programs?
- Are trainees required to pay? Are they paid?
- How do you solicit and distribute information about availability of training programs?
- Do you offer any formal certifications?

Now that you know about our study, what questions should we have asked that we didn't?

What aspects of post-disaster reconstruction and recovery do you think still need to be investigated?

# HOUSEHOLD SURVEY

When constructed structure:

Year and Month

Number of rooms:

Land Ownership:

- ☐ Own (with land title)
- ☐ Own (w/o land title)
- ☐ Rent (paid)
- ☐ Rent (free)
- ☐ Informal settlement

Does your house have building permit from the municipality?

- ☐ Yes
- ☐ No
- ☐ Not Sure

What/where is the nearest body of water?  
ASSESS HOW HIGH. Elevation above nearest body of water:

- ☐ 0-1 meters
- ☐ 1-2 meters
- ☐ 2-3 meters
- ☐ 3-4 meters
- ☐ 4-5 meters
- ☐ 5+ meters

Foundations, Walls, Roofing, Connection

Type:

| Walls                             | Roofing                            | Connections                            |
|-----------------------------------|------------------------------------|----------------------------------------|
| <input type="checkbox"/> Amakan   | <input type="checkbox"/> Tarpaulin | <input type="checkbox"/> Nailed        |
| <input type="checkbox"/> Coconut  | <input type="checkbox"/> Nipa      | <input type="checkbox"/> Wire or Rope  |
| <input type="checkbox"/> Hardwood | <input type="checkbox"/> CGI       | <input type="checkbox"/> Timber Cleats |
| <input type="checkbox"/> Plywood  | <input type="checkbox"/> Steel     | <input type="checkbox"/> Steel Straps  |
| <input type="checkbox"/> Masonry  | <input type="checkbox"/> Concrete  | <input type="checkbox"/> Bolts         |

Homeowner Assessment:

- ☐ Poor
- ☐ Below Average
- ☐ Above Average
- ☐ Excellent

Deterioration:

How would you compare your current house to your home pre-Yolanda?

- ☐ Much worse
- ☐ Somewhat worse
- ☐ About the same
- ☐ Somewhat better
- ☐ Much better

What is the strongest signal storm you believe your house would survive?

- ☐ Signal 1
- ☐ Signal 2
- ☐ Signal 3
- ☐ Signal 4
- ☐ Signal 5

Explain:

What (if any) additions have you made to your home since handover?

Explain:

What (if any) maintenance have you performed on your home since handover?

If you needed to repair your house, who would you go to?

- ☐ Self-Perform
- ☐ Family Member
- ☐ Skilled Labour (in barangay)
- ☐ Skilled Labour (in another barangay)

What (if any) maintenance will you perform in the future?

Did you receive any maintenance training for your house?

- ☐ Yes
- ☐ No

Explain:

What is your access to sanitation?

- ☐ Private toilet (attached)
- ☐ Private toilet (detached)
- ☐ Shared toilet with neighbour
- ☐ Communal toilet
- ☐ Open Defecation

Type of system:

- ☐ Septic Tank
- ☐ Lined Pit Latrine
- ☐ Unlined Pit Latrine
- ☐ None (ocean or water source)

How will you maintain the system?

Do your sanitation practices change at night?

What is your primary source of drinking water?

- ☐ Tap in home
- ☐ Private tap
- ☐ Communal tap
- ☐ Private well
- ☐ Communal well
- ☐ Home delivery
- ☐ Trucked water
- ☐ Bottled water (store)

Distance to source:

- ☐ 0-1 minutes
- ☐ 1-3 minutes
- ☐ 3-5 minutes
- ☐ 5-10 minutes
- ☐ Over 10 minutes

How often do you have service interruptions?

- ☐ Never
- ☐ Once every few months
- ☐ Once per month
- ☐ Once per week
- ☐ Once per day

What is your primary source of washing/bathing water?

- ☐ Tap in home
- ☐ Communal tap
- ☐ Private well
- ☐ Communal well
- ☐ Stream or pond

Distance to source:

- ☐ 0-1 minutes
- ☐ 1-3 minutes
- ☐ 3-5 minutes
- ☐ 5-10 minutes
- ☐ Over 10 minutes

How often do you have service interruptions?

- ☐ Never
- ☐ Once every few months
- ☐ Once per month
- ☐ Once per week
- ☐ Once per day

Do you have access to electricity?

- ☐ Yes (private)
- ☐ Yes (tapped or shared)
- ☐ No

How often do you have service interruptions?

- ☐ Never
- ☐ Once every few months
- ☐ Once per month
- ☐ Once per week
- ☐ Once per day

Do you have a solar charger or solar lamp?

- ☐ Solar charger
- ☐ Solar lamp

Where is closest paved road? Is your home within 100m of a paved road?

- ☐ Yes
- ☐ No

What is your primary means of transportation?

- ☐ Motorbike
- ☐ Jeepney
- ☐ Tricycle (motor)
- ☐ Tricycle (pedal)
- ☐ Walking

Does your household own a motorbike or tricycle?

- ☐ Yes
- ☐ No

How were you warned for Typhoon Ruby?

- ☐ Neighbour
- ☐ Barangay Official
- ☐ Radio
- ☐ TV

Did you evacuate?

- ☐ Yes
- ☐ No

Where did you evacuate to?

- ☐ Private House (within barangay)
- ☐ Private House (outside barangay)
- ☐ Church
- ☐ Barangay Hall
- ☐ Barangay Health Centre
- ☐ School
- ☐ Commercial Building
- ☐ N/A

Have you received any disaster training in the last year?

- ☐ Yes
- ☐ No

Explain:

Size of household:

Number of children under age 18:

Number of school-aged children who attend school:

How frequently do your elementary school aged children attend school?

- ☐ Always
- ☐ Most of the time
- ☐ Sometimes
- ☐ Infrequently
- ☐ N/A

How frequently do your high school aged children attend school?

- ☐ Always
- ☐ Most of the time
- ☐ Sometimes
- ☐ Infrequently
- ☐ N/A

Number of household members with high school diploma:

Number of household members with college degrees:

Number of adults over age 65:

Number of household members with special needs:

Number household members employed:

Weekly household income (PHP):

Weekly expenses (PHP):

Total current savings (PHP):

Do you have access to credit (including micro-finance)?

- ☐ Yes
- ☐ No

How many mobile phones does your household have?

Where were you born?

- ☐ This barangay
- ☐ This municipality
- ☐ This province
- ☐ Other province

Where was your spouse or partner born? (if applicable)

- ☐ This barangay
- ☐ This municipality
- ☐ This province
- ☐ Other province
- ☐ N/A

Is your household involved in any social groups/committees in your barangay, such as a church, women's group or other entity?

Please rate your household's level of involvement:

- ☐ Not active
- ☐ Somewhat active
- ☐ Active
- ☐ Very Active

Do you know your neighbours? Have you helped your neighbours in the last year? How?

## Barangay Survey

What is your position?

- ☐ Barangay Captain
- ☐ Barangay Councilor
- ☐ Barangay Health Worker
- ☐ Member of DMRRC

Your barangay has a disaster risk reduction and management council (DRRMC).

- ☐ Yes
- ☐ No

Your barangay has a written disaster management plan.

- ☐ Yes
- ☐ No

What risks did you consider in your disaster management plan?

Does your barangay have any of the following?

- ☐ Salt Marshes
- ☐ Wetlands
- ☐ Mangroves
- ☐ Seawalls
- ☐ Drainage Channels

What percent of your barangay's budget is allocated for disaster management?

Can you say that "The disaster management culture with our municipality and neighbour barangays is collaborative."

- ☐ Strongly disagree
- ☐ Disagree
- ☐ Agree
- ☐ Strongly Agree

We have shared our disaster management plan with neighbour barangays.

- ☐ Yes
- ☐ No

We have shared our disaster management plan with our municipality.

- ☐ Yes
- ☐ No

Please rate the quality of water supply in your barangay.

- ☐ Poor
- ☐ Below average
- ☐ Above average
- ☐ Excellent

Does your barangay have a generator?

- ☐ Yes
- ☐ No
- ☐ Not Sure

Please rate the quality of roads in your barangay.

- ☐ Poor
- ☐ Below average
- ☐ Above average
- ☐ Excellent

Nearest hospitals and distances:

Primary elementary schools and distances:

Primary high schools and distances:

Designated evacuation centres and distances:

Has your barangay offered any disaster training in the last year? Who?

- ☐ Yes
- ☐ No

*Relocation (if applicable):*

What did you consider in relocating? WHY?

What NEW risks arose after relocating?

## Municipality Survey

What is your position?

- ☐ Mayor
- ☐ Municipal Councilor
- ☐ Member of DMRRC
- ☐ Other

Your municipality has a disaster risk reduction and management council (DRRMC).

- ☐ Yes
- ☐ No

Your municipality has a zoning plan.

- ☐ Yes
- ☐ No

Your municipality has a written disaster management plan.

- ☐ Yes
- ☐ No

What risks did you consider in your disaster management plan?

What percent of your municipality's budget is allocated for disaster management?

Can you say that "The disaster management culture with our barangays and neighbour municipalities is collaborative."

- ☐ Strongly disagree
- ☐ Disagree
- ☐ Agree
- ☐ Strongly Agree

We have shared our disaster management plan with neighbour municipalities.

- ☐ Yes
- ☐ No

We have shared our disaster management plan with our barangays.

- ☐ Yes
- ☐ No

Please rate the quality of water supply in your municipality.

- ☐ Poor
- ☐ Below average
- ☐ Above average
- ☐ Excellent

Please rate the quality of roads in your municipality.

- ☐ Poor
- ☐ Below average
- ☐ Above average
- ☐ Excellent

Has your barangay offered any disaster training in the last year?

- ☐ Yes
- ☐ No

Relocation:

What did you consider in relocating barangays?

What risks arose after relocating barangays
