# Supplementary material
Source: MDPI journal article supplement (https://www.mdpi.com/2071-1050/10/11/4241)
Supplement: s1 [file s1 › S3 - Qualtiative Comparative Analysis Procedures.pdf]

# QUALITATIVE COMPARATIVE ANALYSIS PROCEDURES

We considered six conditions in our analysis. A consistency cutoff of 0.8 was used, while also considering PRI values of pathways. While no specific cutoff was used for PRI, pathways with large gaps between raw consistency and PRI values were removed. Through subset/superset analysis, conditions were then removed in order to achieve more parsimonious solutions.

The truth table for the analysis is provided below in Table 2.

## Simplifying Assumptions

Part of QCA relies on making Boolean minimization, drawing from relevant theoretical and substantive knowledge in order to resolve counterfactuals. In order to achieve parsimony in the solutions created, we have drawn on 'easy counterfactuals' to reduce complexity (Ragin and Sonnett 2005). While often neglected, simplifying assumptions constitute an important step in the QCA process. For the outcome, we have included a discussion of assumptions made, drawing on theoretical and case knowledge used to inform these decisions. A summary of simplifying assumptions for all conditions are presented in Table 1 below.

**TABLE 1: SUMMARY OF SIMPLIFYING ASSUMPTIONS FOR RESILIENCE AND SUSTAINABILITY**

|                                   | <b>Resilience</b> | <b>Sustainability</b> |
|-----------------------------------|-------------------|-----------------------|
| <b>Planning Coordination</b>      | Present           | Present               |
| <b>Planning Participation</b>     | Present           | Present               |
| <b>Design Coordination</b>        | Present           | Present               |
| <b>Design Participation</b>       | Present           | Present               |
| <b>Construction Participation</b> | Present           | Present               |
| <b>Construction Training</b>      | Present           | Present               |

**TABLE 2: RESILIENCE AND SUSTAINABILITY TRUTH TABLE**

| Case | Community         | PlanCoord | PlanPart | DesCoord | DesPart | ConstPart | ConstTrain | Resilience | Sustain | Combined |
|------|-------------------|-----------|----------|----------|---------|-----------|------------|------------|---------|----------|
| 1    | Okoy              | 0.78      | 0.70     | 0.67     | 0.67    | 0.17      | 1.00       | 0.59       | 0.70    | 0.59     |
| 2    | Maricaban         | 0.68      | 0.00     | 0.33     | 0.00    | 0.50      | 0.50       | 0.36       | 0.60    | 0.36     |
| 3    | Poblacion         | 0.44      | 0.00     | 0.00     | 0.00    | 0.50      | 0.00       | 0.46       | 0.22    | 0.22     |
| 4    | Sungko            | 0.11      | 1.00     | 0.00     | 0.00    | 0.35      | 0.00       | 0.47       | 0.45    | 0.45     |
| 5    | Sillon            | 0.44      | 0.00     | 0.33     | 0.00    | 0.50      | 0.00       | 0.35       | 0.37    | 0.35     |
| 6    | Kangkaibe         | 1.00      | 0.00     | 0.33     | 0.00    | 0.50      | 0.50       | 0.39       | 0.67    | 0.39     |
| 7    | Tagpuro           | 0.44      | 0.00     | 0.33     | 0.00    | 0.50      | 0.00       | 0.40       | 0.21    | 0.21     |
| 8    | Pago              | 0.46      | 0.00     | 0.33     | 0.00    | 0.50      | 0.50       | 0.29       | 0.37    | 0.29     |
| 9    | New Kawayan (101) | 0.22      | 1.00     | 0.00     | 0.00    | 0.85      | 0.84       | 0.69       | 0.73    | 0.69     |
| 10   | Bagacay (93)      | 0.78      | 0.00     | 0.33     | 0.00    | 0.17      | 1.00       | 0.43       | 0.69    | 0.43     |
| 11   | San Agustin       | 0.22      | 0.00     | 0.33     | 0.00    | 0.34      | 0.34       | 0.39       | 0.27    | 0.27     |
| 12   | San Jose (83C)    | 0.78      | 1.00     | 0.33     | 0.67    | 0.50      | 0.50       | 0.68       | 0.85    | 0.68     |
| 13   | Magallanes (52)   | 1.00      | 1.00     | 1.00     | 0.67    | 1.00      | 0.50       | 0.42       | 0.45    | 0.42     |
| 14   | San Jose (85)     | 0.57      | 1.00     | 0.00     | 0.00    | 0.67      | 1.00       | 0.42       | 0.65    | 0.42     |
| 15   | Hiabangan         | 0.68      | 1.00     | 0.00     | 0.00    | 0.50      | 0.84       | 0.72       | 0.75    | 0.72     |
| 16   | Sagkahan (62)     | 1.00      | 1.00     | 1.00     | 0.67    | 0.50      | 0.67       | 0.73       | 0.88    | 0.73     |
| 17   | Sulangan          | 0.78      | 0.70     | 1.00     | 0.67    | 1.00      | 1.00       | 0.58       | 0.59    | 0.58     |
| 18   | Cogon             | 0.56      | 0.00     | 0.33     | 0.00    | 0.50      | 0.00       | 0.50       | 0.42    | 0.42     |
| 19   | Cantahay          | 0.67      | 0.00     | 0.00     | 0.33    | 0.85      | 1.00       | 0.30       | 0.38    | 0.30     |

## Resilience

As a preliminary step, we first investigate the necessity and coverage of individual conditions on resilience. The results of this initial analysis are shown in Table 1 below. The presence of all conditions is expected to lead to resilience. We expect that the presence of each individual condition will result in more efficient project management processes and resilience.

**TABLE 1: NECESSITY AND SUFFICIENCY OF RESILIENCE OUTCOME**

| Condition                  | Necessity | Coverage |
|----------------------------|-----------|----------|
| Planning Coordination      | 0.883446  | 0.699714 |
| Construction Participation | 0.836466  | 0.740158 |
| Construction Training      | 0.729754  | 0.659066 |
| Planning Participation     | 0.577806  | 0.631796 |
| Design Coordination        | 0.571089  | 0.789969 |
| Design Participation       | 0.351351  | 0.878129 |

### Assumptions:

- ❖ Planning Coordination (present)
- ❖ Planning Participation (present)
- ❖ Design Coordination (present)
- ❖ Design Participation (present)
- ❖ Construction Participation (present)
- ❖ Construction Training (present)

## Preliminary Intermediate Solution

| Pathway                                        | Raw Coverage | Unique Coverage | Consistency | Cases                                      |
|------------------------------------------------|--------------|-----------------|-------------|--------------------------------------------|
| consttrain*constpart*planpart                  | 0.412214     | 0.194111        | 0.863014    | New Kawayan (101), San Jose (85), Sulangan |
| consttrain*despart*descoord*planpart*plancoord | 0.282443     | 0.064340        | 0.911972    | Okoy, Sagkahan (62), Sulangan              |

solution coverage: 0.476554

solution consistency: 0.865347

## Subset/Superset Analysis

In order to potentially reduce the complexity of the solution obtained, we next investigate each of the pathways obtained in the initial intermediate solution to determine if there are simpler pathways which maintain the same level of consistency, but potentially greater coverage. The two pathways from the resilience solution are listed below. Combinations of conditions are listed for all subsets higher than the original pathway, if such subsets exist. If such a subset does not exist, then up to five subsets greater than the consistency cutoff value of 0.8, are listed.

### Pathway 1: consttrain\*constpart\*planpart

| Subset                        | Consistency | Coverage |
|-------------------------------|-------------|----------|
| consttrain*constpart*planpart | 0.863014    | 0.412214 |

### Pathway 2: consttrain\*despart\*descoord\*planpart\*plancoord

| Subset                                | Consistency | Coverage |
|---------------------------------------|-------------|----------|
| consttrain*despart*planpart           | 0.916943    | 0.300981 |
| consttrain*despart*planpart*plancoord | 0.916943    | 0.300981 |
| consttrain*despart                    | 0.916168    | 0.333697 |
| consttrain*despart*plancoord          | 0.916168    | 0.333697 |
| consttrain*despart*descoord           | 0.911972    | 0.282443 |
| consttrain*despart*descoord*planpart  | 0.911972    | 0.282443 |

|                                                |          |          |
|------------------------------------------------|----------|----------|
| consttrain*despart*descoord*plancoord          | 0.911972 | 0.282443 |
| consttrain*despart*descoord*planpart*plancoord | 0.911972 | 0.282443 |
| consttrain*descoord*plancoord                  | 0.910913 | 0.446020 |

From the subset/superset analysis as well as the earlier necessity and sufficiency analysis, we can remove design participation and maintain the same level of consistency. We thus remove this condition from the analysis.

## Final Intermediate Solution

| Pathway                                | Raw Coverage | Unique Coverage | Consistency | Cases                                      |
|----------------------------------------|--------------|-----------------|-------------|--------------------------------------------|
| consttrain*constpart*planpart          | 0.412214     | 0.194111        | 0.863014    | New Kawayan (101), San Jose (85), Sulangan |
| consttrain*descoord*planpart*plancoord | 0.282443     | 0.064340        | 0.902439    | Okoy, Sagkahan (62), Sulangan              |

solution coverage: 0.476554

solution consistency: 0.865347

From the revised analysis, three cases fall into the first pathway and three fall into the second, with one of these cases overlapping.

## Sustainability

As a preliminary step, we first investigate the necessity and coverage of individual conditions. The results of this initial analysis are shown in Table 1 below. The presence of all conditions is expected to lead to sustainability.

**TABLE 1: NECESSITY AND SUFFICIENCY OF SUSTAINABILITY OUTCOME**

| Condition                  | Necessity | Coverage |
|----------------------------|-----------|----------|
| Planning Coordination      | 0.890482  | 0.785283 |
| Construction Participation | 0.765156  | 0.753854 |
| Construction Training      | 0.755867  | 0.760079 |
| Planning Participation     | 0.590450  | 0.718849 |
| Design Coordination        | 0.525098  | 0.808735 |
| Design Participation       | 0.330020  | 0.918367 |

### Assumptions:

- ❖ Planning Coordination (present)
- ❖ Planning Participation (present)
- ❖ Design Coordination (present)
- ❖ Design Participation (present)
- ❖ Construction Participation (present)
- ❖ Construction Training (present)

## Preliminary Intermediate Solution

| Pathway                         | Raw Coverage | Unique Coverage | Consistency | Cases                                      |
|---------------------------------|--------------|-----------------|-------------|--------------------------------------------|
| consttrain*~constpart*plancoord | 0.498537     | 0.288780        | 0.951583    | Okoy, Bagacay (93)                         |
| consttrain*constpart*planpart   | 0.399024     | 0.189268        | 0.93379     | New Kawayan (101), San Jose (85), Sulangan |

solution coverage: 0.687805

solution consistency: 0.927362

## Subset/Superset Analysis

In order to potentially reduce the complexity of the solution obtained, we next investigate each of the pathways obtained in the initial intermediate solution to determine if there are simpler pathways which maintain the same level of consistency, but potentially greater coverage. The two pathways from the sustainability solution are listed below. Combinations of conditions are listed for all subsets higher than the original pathway, if such subsets exist. If such a subset does not exist, then up to five subsets greater than the consistency cutoff value of 0.8, are listed.

### Pathway 1: consttrain\*~constpart\*plancoord

| Subset                          | Consistency | Coverage |
|---------------------------------|-------------|----------|
| consttrain*~constpart*plancoord | 0.951583    | 0.498537 |
| consttrain*~constpart           | 0.916519    | 0.503415 |

### Pathway 2: consttrain\*constpart\*planpart

| Subset                        | Consistency | Coverage |
|-------------------------------|-------------|----------|
| consttrain*constpart*planpart | 0.93379     | 0.399024 |

Despite similar consistency and coverage of the both combinations of conditions in pathway 1, the presence of planning coordination provides strong explanatory power for the cases. We could also remove both conditions during the design phase, design coordination and design participation, however analysis after removing these conditions does not have an impact on the final pathways. As a result, there is no need to revise the initial pathways determined.

## Combined Resilience and Sustainability

In order to analyze the combined outcome of resilience and sustainability, we assign the minimum value of the two individual outcomes. Practically, the lower value limits the presence of the combined outcome. For example, in case 1, the community of Okoy had a resilience set value of 0.59 and a sustainability set value of 0.70, thus the 0.59 becomes the combined set value. Across all of the cases examined, there were no cases where resilience was present without the presence of sustainability – in particular, six cases exhibited the combined outcome.

As a preliminary step, we again first investigate the necessity and coverage of individual conditions. The results of this initial analysis are shown in Table 1 below. The presence of all conditions is expected to lead to sustainability.

**TABLE 1: NECESSITY AND SUFFICIENCY OF COMBINED RESILIENCE AND SUSTAINABILITY OUTCOME**

| Condition                  | Necessity | Coverage |
|----------------------------|-----------|----------|
| Planning Coordination      | 0.893587  | 0.656762 |
| Construction Participation | 0.833064  | 0.684046 |
| Construction Training      | 0.778191  | 0.652184 |
| Planning Participation     | 0.620299  | 0.629399 |
| Design Coordination        | 0.593717  | 0.762107 |
| Design Participation       | 0.378627  | 0.878129 |

### Assumptions:

- ❖ Planning Coordination (present)
- ❖ Planning Participation (present)
- ❖ Design Coordination (present)
- ❖ Design Participation (present)
- ❖ Construction Participation (present)
- ❖ Construction Training (present)

## Intermediate Solution

| Pathway                                        | Raw Coverage | Unique Coverage | Consistency | Cases                                      |
|------------------------------------------------|--------------|-----------------|-------------|--------------------------------------------|
| consttrain*constpart*planpart                  | 0.412214     | 0.194111        | 0.863014    | New Kawayan (101), San Jose (85), Sulangan |
| consttrain*despart*descoord*planpart*plancoord | 0.282443     | 0.064340        | 0.911972    | Okoy, Sagkahan (62), Sulangan              |

solution coverage: 0.514723

solution consistency: 0.865347

## Subset/Superset Analysis

In order to potentially reduce the complexity of the solution obtained, we next investigate each of the pathways obtained in the initial intermediate solution to determine if there are simpler pathways which maintain the same level of consistency, but potentially greater coverage. The two pathways from the combined solution are listed below. Combinations of conditions are listed for all subsets higher than the original pathway, if such subsets exist. If such a subset does not exist, then up to five subsets greater than the consistency cutoff value of 0.8, are listed.

### Pathway 1: consttrain\*constpart\*planpart

| Subset                        | Consistency | Coverage |
|-------------------------------|-------------|----------|
| consttrain*constpart*planpart | 0.863014    | 0.44523  |

### Pathway 2: consttrain\*despart\*descoord\*planpart\*plancoord

| Subset                                         | Consistency | Coverage |
|------------------------------------------------|-------------|----------|
| consttrain*despart*planpart                    | 0.916943    | 0.325088 |
| consttrain*despart*planpart*plancoord          | 0.916943    | 0.325088 |
| consttrain*despart                             | 0.916168    | 0.360424 |
| consttrain*despart*plancoord                   | 0.916168    | 0.360424 |
| consttrain*despart*descoord                    | 0.911972    | 0.305065 |
| consttrain*despart*descoord*planpart           | 0.911972    | 0.305065 |
| consttrain*despart*descoord*plancoord          | 0.911972    | 0.305065 |
| consttrain*despart*descoord*planpart*plancoord | 0.911972    | 0.305065 |
| consttrain*descoord*plancoord                  | 0.910913    | 0.481743 |

Similar to the standalone resilience outcomes, our analysis reveals that design participation can be removed as it does not appear in more parsimonious pathways.

## Final Intermediate Solution

| Pathway                                | Raw Coverage | Unique Coverage | Consistency | Cases                                      |
|----------------------------------------|--------------|-----------------|-------------|--------------------------------------------|
| consttrain*constpart*planpart          | 0.445230     | 0.209658        | 0.863014    | New Kawayan (101), San Jose (85), Sulangan |
| consttrain*descoord*planpart*plancoord | 0.305065     | 0.069494        | 0.902439    | Okoy, Sagkahan, Sulangan                   |

solution coverage: 0.514723

solution consistency: 0.865347
